# Supplementary material for: A Physiologically Based Pharmacokinetic Model of Isoniazid and Its Application in Individualizing Tuberculosis Chemotherapy
Source: PubMed Central journal article supplement (PMC5038291; doi:10.1128/aac.00508-16), 2016-09-23
Supplement: AAC.00508-16_zac010165585so1.pdf [file AAC.00508-16_zac010165585so1.pdf]

## 1 **Supplementary Material**

2 **PBPK Model Construction & Validation.** Parameters of the physiologically-based  
3 pharmacokinetic (PBPK) models can be separated into 1) anthropometric parameters  
4 describing the anatomy and physiology of the human organism with its tissues, organs  
5 and sub-compartments (**Fig. SI 1**), 2) physicochemical properties (e.g. lipophilicity  
6 coefficient or the fraction of unbound drug) of the modeled compounds used to describe  
7 passive absorption and diffusion processes, and 3) kinetic parameters characterizing  
8 active transport and enzymatic reaction processes. In this study anthropometric  
9 parameters were taken from the corresponding studies. If the studies did not provide  
10 these parameters, mean values provided by the PBPK modeling software (PK-Sim®;  
11 Version 6.0.3; Bayer Technology Services GmbH, Leverkusen, Germany) were used. The  
12 physicochemical parameters for INH and its metabolites were calculated with  
13 cheminformatics software (MarvinSketch; Version 15.11.30.0; ChemAxon Kft., Budapest,  
14 Hungary). Metabolic reactions and active transport were integrated into the PBPK model.  
15 Michaelis-Menten kinetics were used to describe the reaction rates. Tissue specific  
16 relative enzyme and transporter abundances were quantified by gene expression data  
17 provided by the PBPK modeling software (1).

18 Since each of the considered metabolites is found in the urine (2, 3), renal excretion  
19 processes for these all metabolites were integrated into the PBPK model. For  
20 acetylisoniazid, isonicotinic acid, isonicotinoyl glycine, hydrazine, acetylhydrazine, and  
21 diacetylhydrazine glomerular filtration was considered, while for isoniazid and  
22 acetylisoniazid an active tubular secretion process based on Michaelis-Menten kinetics  
23 was introduced to match experimental data (4). The INH conjugation reaction with  $\alpha$ -

24 ketoglutarate and pyruvate were lumped together into the active tubular secretion  
25 process, since no pharmacokinetic data for those metabolites was available. Intravenous  
26 and oral administration protocols were adapted from the respective clinical study design.  
27 In the QD dosing regimens INH was administered every 24 h, while the BID dosing  
28 regimens consisted of half the cumulated daily INH doses administered every 12 h.

## 29 **PD Model Construction & Validation.**

30 Clinical data describing the early bacterial activity (EBA) in sputum of NAT2 phenotype-  
31 specific tuberculosis patients following a QD dosing regimen in the first two days of INH  
32 monotherapy (5, 6) was used for parameter identification of the PBPK/PD model. To limit  
33 the potentially misleading effect of outliers in the experimental data, only patient  
34 subgroups with more than three individuals were considered. The sampling patterns used  
35 in the original studies were adapted in the PBPK/PD simulations. The simulated  
36 difference in bacterial counts on the first day ( $0h < t < 24h$ ) and on the second day ( $24h$   
37  $< t < 48h$ ) of treatment were averaged to calculate the final EBA for each INH dose.

38 The pharmacodynamic (PD) model (**A1**) describes the change in mycobacterial counts in  
39 immune competent humans ( $\mu(MT)_{IC}^{human}$ ) as sum of mycobacterial growth rate in  
40 immune deficient humans ( $\mu(MT)_{ID}^{human}$ ), immune system dependent antimycobacterial  
41 killing ( $\beta^{human}$ ) and INH dependent killing rate ( $\gamma(INH)$ ). We conducted a literature review  
42 in order to identify *M. tuberculosis* growth rates in humans and mice. For untreated  
43 immune competent humans ( $\mu(MT)_{IC}^{human}$ ) we found an averaged the growth rate of  
44  $0.0209 \log_{10}CFU \cdot day^{-1}$  (7, 8, 5, 9, 10, 6, 11). To estimate  $\beta^{human}$  we used experimental  
45 derived *M. tuberculosis* growth rates in mice and immune deficient humans  
46 ( $\mu(MT)_{ID}^{human}$ ). In immune competent mice, the mycobacterial growth rate was estimated

47 as  $0.1355 \log_{10}\text{CFU}\cdot\text{day}^{-1}$  ( $\mu(MT)_{IC}^{mice}$ ) (12, 13) and  $0.295 \log_{10}\text{CFU}\cdot\text{day}^{-1}$  for immune  
 48 deficient mice ( $\mu(MT)_{ID}^{mice}$ ) (12), resulting in  $0.1595 \log_{10}\text{CFU}\cdot\text{day}^{-1}$  for  $\beta^{mice}$ . We  
 49 assumed a constant ratio between the untreated immune dependent and immune  
 50 deficient growth rates of *M. tuberculosis* in human and mice. From **A2**, we then calculated  
 51  $\mu(MT)_{ID}^{human}$  as  $0.0428 \log_{10}\text{CFU}\cdot\text{day}^{-1}$  and from **A3**  $\beta^{human}$  as  $0.0219 \log_{10}\text{CFU}\cdot\text{day}^{-1}$ .

$$\mu(MT)_{IC}^{human} = \mu(MT)_{ID}^{human} - \beta^{human} - \gamma(INH) \quad \mathbf{A1}$$

52

$$\mu(MT)_{ID}^{human} = \frac{\mu(MT)_{IC}^{human} * \mu(MT)_{ID}^{mice}}{\mu(MT)_{IC}^{mice}} \quad \mathbf{A2}$$

53

$$\beta^{human} = \mu(MT)_{ID}^{human} - \mu(MT)_{IC}^{human} \quad \mathbf{A3}$$

54

55 **SI Tables**

56 **Table S 1: PBPK model parameters for urinary excretion of INH and its metabolites**

| <b>Table S 1: PBPK model parameters for urinary excretion of INH and its metabolites</b> |                                                                          |                                                  |                               |
|------------------------------------------------------------------------------------------|--------------------------------------------------------------------------|--------------------------------------------------|-------------------------------|
| Renal excretion                                                                          | $V_{max}^*$<br>( $\mu\text{mol}\cdot\text{L}^{-1}\cdot\text{min}^{-1}$ ) | $K_m^*$<br>( $\mu\text{mol}\cdot\text{L}^{-1}$ ) | Glomerular<br>filtration rate |
| Isoniazid                                                                                | 20                                                                       | 300                                              | 0                             |
| Acetylisoniazid                                                                          | 0.3                                                                      | 20                                               | 0                             |
| Hydrazine                                                                                | 0                                                                        | 0                                                | 1                             |
| Diacetylhydrazine                                                                        | 0                                                                        | 0                                                | 0.4                           |
| Acetylisoniazid                                                                          | 0                                                                        | 0                                                | 1                             |
| Acetylhydrazine                                                                          | 0                                                                        | 0                                                | 0.2                           |
| Isonicotinic acid                                                                        | 0                                                                        | 0                                                | 1                             |
| Isonicotinoyl glycine                                                                    | 0                                                                        | 0                                                | 1                             |

57 \*Kinetic parameters for tubular secretion

58

59 **Table S 2: Parameters used in population simulation**

60 PatientPopulation.xlsx

61 **Table S 3: Sampled beta for immune deficient population**

62 immune\_deficient\_beta.xlsx

63

## 64 **SI Figures**

65 **Fig. SI 1:** PBPK model structure in PK-Sim®.

66 **Fig. SI 2:** Simulated (lines) and experimental (symbols) PK profiles of A) INH (solid;  
67 circles) following a single 300 mg INH intravenous administration in fast acetylators (14),  
68 B) INH (solid; circles), acetylisoniazid (AcINH) (dashed; triangles), isonicotinic acid (INA)  
69 (dotted; squares), and isonicotinoyl glycine (INAG) (dash-dotted; diamonds) following a  
70 single 300 mg intravenous administration in fast acetylators (15). C) observed (2, 3) vs.  
71 predicted INH, AcINH, INA, and INAG plasma concentrations in fast acetylators following  
72 single intravenous INH dose of 300 mg.

73 **Fig. SI 3:** Simulated (lines) and experimental (circles) (16) INH PK profiles A) following a  
74 single 300 mg oral INH dose in intermediate (FS) acetylators (solid), B) INH PK profiles  
75 following single a 300 mg, 600 mg, or 900 mg oral INH dose in fast (FF) acetylators  
76 (dashed). C) observed (16) vs. predicted INH plasma concentrations for intermediate and  
77 fast acetylators following a single oral INH dose of 300 mg, and 300 mg, 600 mg, or 900  
78 mg, respectively.

79 **Fig. SI 4:** Simulated INH A-C) and AcINH D-E) pharmacokinetic profiles of virtual patient  
80 populations comprising 1,000 individuals. The population median (solid), the 25<sup>th</sup> and 75<sup>th</sup>  
81 (dashed), and 5<sup>th</sup> and 95<sup>th</sup> (dotted) percentiles after receiving a single oral dose of 300  
82 mg INH are shown. Subfigure A) and D) show slow, B) and E) intermediate, and C) and  
83 F) fast acetylator populations.

84 **Fig. SI 5:** Plasma concentration profiles of INH and its metabolites as simulations (lines)  
85 and experimental data (symbols) (17). A) PK profiles of slow acetylators (SS) for INH  
86 (black solid, circles), acetylhydrazine (AcHz) (black solid, triangles), and intermediate

87 acetylators (FS) for INH (grey dashed, circles), AcHz (grey dashed, triangles). B)  
88 observed (17) vs. predicted INH and AcHz plasma concentrations for slow and  
89 intermediate acetylators following single oral INH dose of 300 mg.

90 **Fig. SI 6:** Plasma concentration profiles of INH and its metabolites as simulations (lines)  
91 and experimental data (symbols) (18). A) PK profiles of slow acetylators (SS) for INH  
92 (black solid, circles) and hydrazine (Hz) (black solid, right-pointing triangles) and  
93 intermediate acetylators (FS) for INH (grey dashed, circles) and Hz (grey dashed, right-  
94 pointing triangles). B) observed (18) vs. predicted INH and Hz plasma concentrations for  
95 slow and intermediate acetylators following single oral INH dose of 300 mg.

96 **Fig. SI 7:** Plasma concentration profiles of INH and its metabolites as simulations (lines)  
97 and experimental data (symbols) (19). A) PK profiles of slow acetylators (SS) for AcHz  
98 (black solid, left-pointing triangles), diacetylhydrazine (DiAcHz) (black solid, down-  
99 pointing triangles) and intermediate acetylators (FS) for AcHz (grey dashed, left-pointing  
100 triangles), DiAcHz (grey dashed, down-pointing triangles). B) observed (19) vs. predicted  
101 AcHz and DiAcHz plasma concentrations for slow and intermediate acetylators following  
102 single oral INH dose of 300 mg.

103 **Fig. SI 8:** Plasma concentration profiles of INH and its metabolites as simulations (lines)  
104 and experimental data (symbols) (20). A) PK profiles of slow acetylators (SS) for INH  
105 (black solid, circles), AcINH (black solid, squares), AcHz (black solid, left-pointing  
106 triangles), DiAcHz (black solid, down-pointing triangles) and fast acetylators (FF) for INH  
107 (grey dashed, circles), AcINH (grey dashed, squares), AcHz (grey dashed, left-pointing  
108 triangles), DiAcHz (grey dashed, down-pointing triangles) and intermediate acetylators  
109 (FS) for INH (grey dotted, circles), AcINH (grey dotted, squares), AcHz (grey dotted, left-

110 pointing triangles), DiAcHz (grey dotted, down-pointing triangles). B) observed (20) vs.  
111 predicted INH, AcINH, AcHz, and DiAcHz plasma concentrations for slow, intermediate,  
112 and fast acetylators following single oral INH dose of 300 mg.

113

114

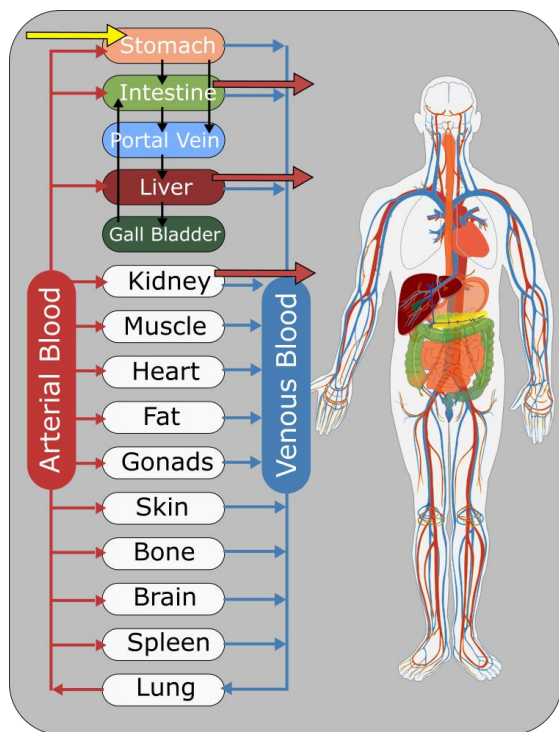

115

116 **Fig. SI 1:** PBPK model structure in PK-Sim®.

117



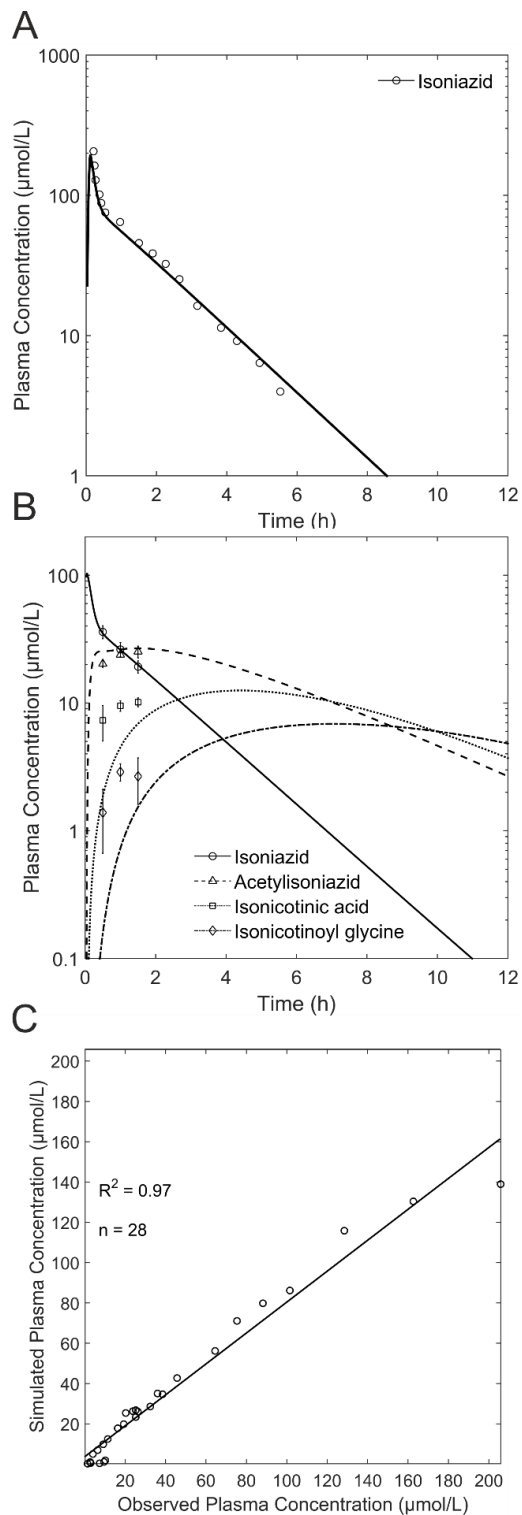

118

119 **Fig. SI 2:** Simulated (lines) and experimental (symbols) PK profiles of A) INH (solid; circles) following a  
 120 single 300 mg INH intravenous administration in fast acetylators (14), B) INH (solid; circles), acetylisoniazid  
 121 (AcINH) (dashed; triangles), isonicotinic acid (INA) (dotted; squares), and isonicotinoyl glycine (INAG)  
 122 (dash-dotted; diamonds) following a single 300 mg intravenous administration in fast acetylators (15). C)  
 123 Observed (2, 3) vs. predicted INH, AcINH, INA, and INAG plasma concentrations in fast acetylators  
 124 following single intravenous INH dose of 300 mg.

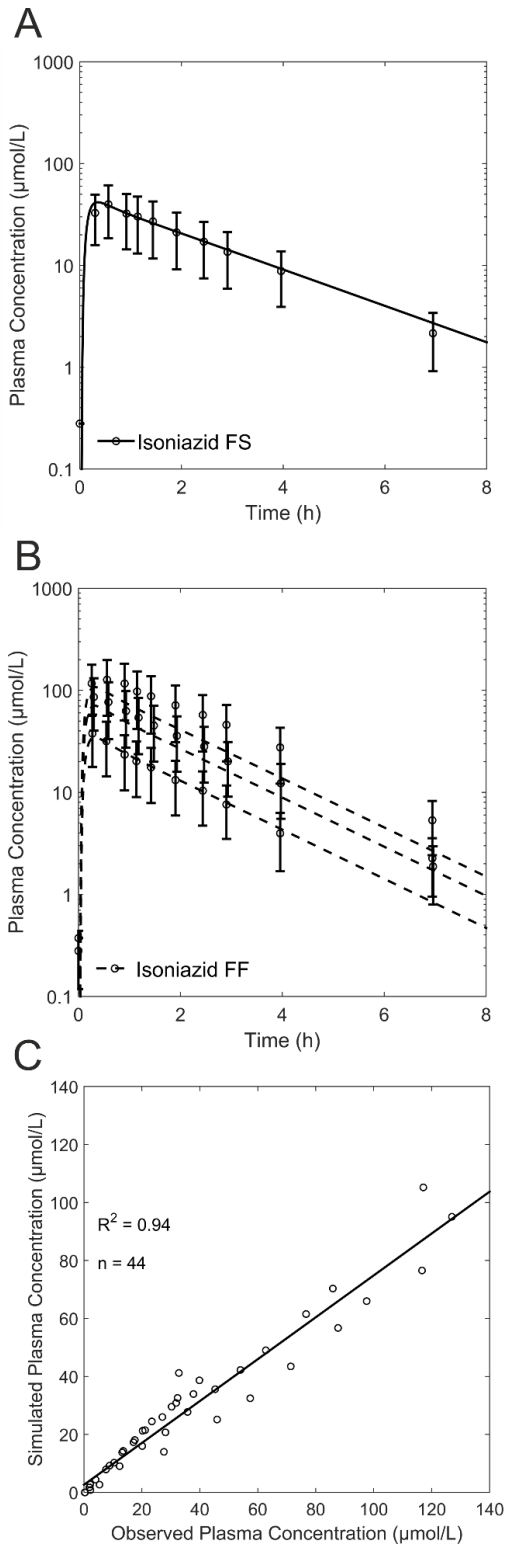

125

126 **Fig. SI 3:** Simulated (lines) and experimental (circles) (16) INH PK profiles A) following a single 300 mg  
 127 oral INH dose in intermediate (FS) acetylators (solid), B) INH PK profiles following single a 300 mg, 600  
 128 mg, or 900 mg oral INH dose in fast (FF) acetylators (dashed). C) Observed (16) vs. predicted INH plasma  
 129 concentrations for intermediate and fast acetylators following a single oral INH dose of 300 mg, and 300  
 130 mg, 600 mg, or 900 mg, respectively.

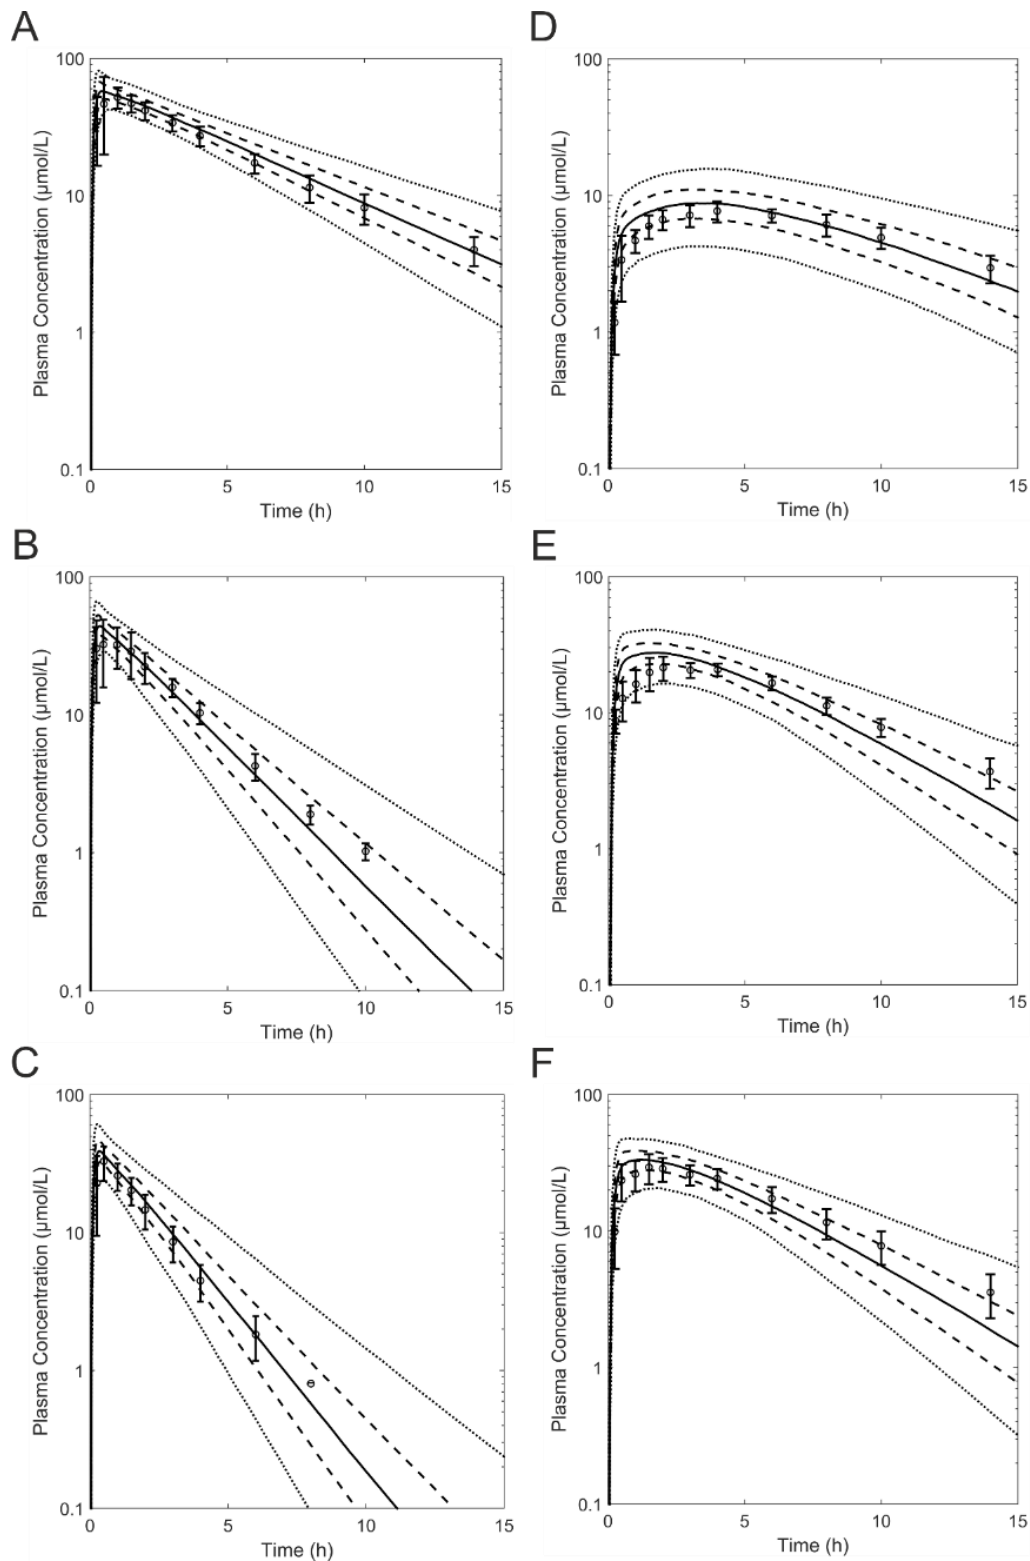

131

132 **Fig. SI 4:** Simulated INH A-C) and AcINH D-E) pharmacokinetic profiles of virtual patient populations  
 133 comprising 1,000 individuals. The population median (solid), the 25<sup>th</sup> and 75<sup>th</sup> (dashed), and 5<sup>th</sup> and 95<sup>th</sup>  
 134 (dotted) percentiles after receiving a single oral dose of 300 mg INH are shown. Subfigure A) and D) show  
 135 slow, B) and E) intermediate, and C) and F) fast acetylator populations.

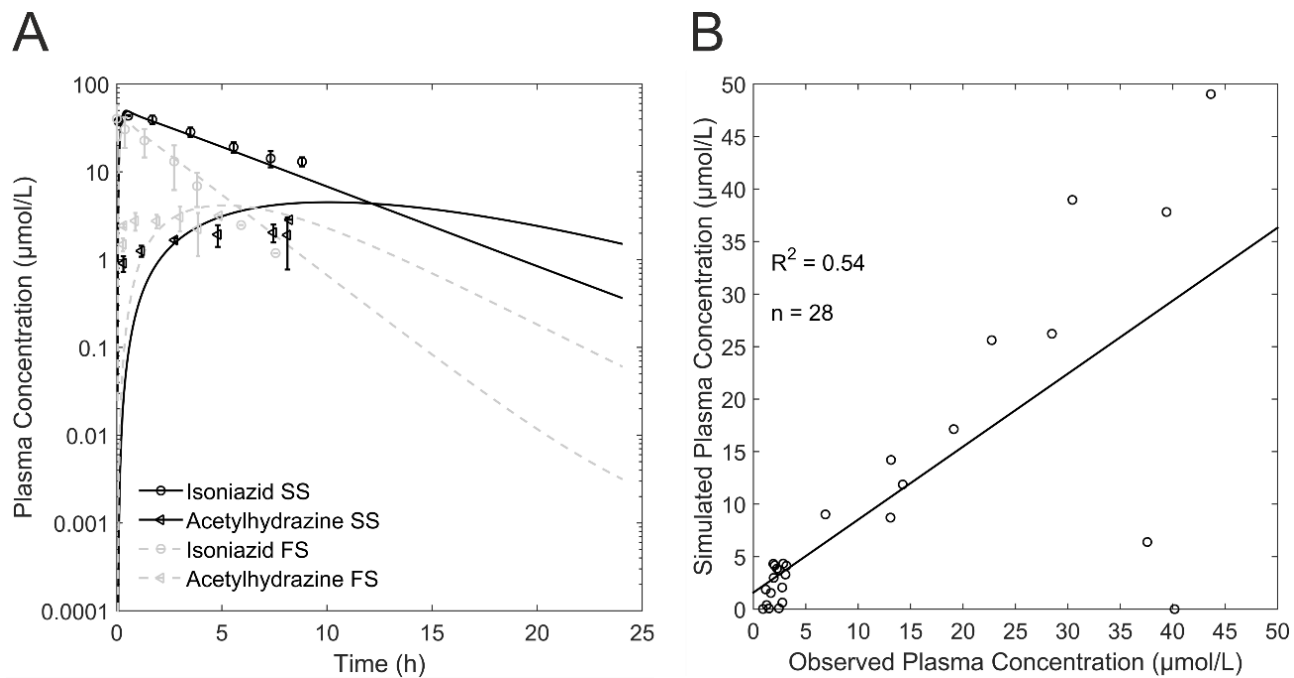

136

137 **Fig. SI 5:** Plasma concentration profiles of INH and its metabolites as simulations (lines) and experimental  
 138 data (symbols) (17). A) PK profiles of slow acetylators (SS) for INH (black solid, circles), acetylhydrazine  
 139 (AChz) (black solid, triangles), and intermediate acetylators (FS) for INH (grey dashed, circles), AChz (grey  
 140 dashed, triangles). B) Observed (17) vs. predicted INH and AChz plasma concentrations for slow and  
 141 intermediate acetylators following single oral INH dose of 300 mg.

142

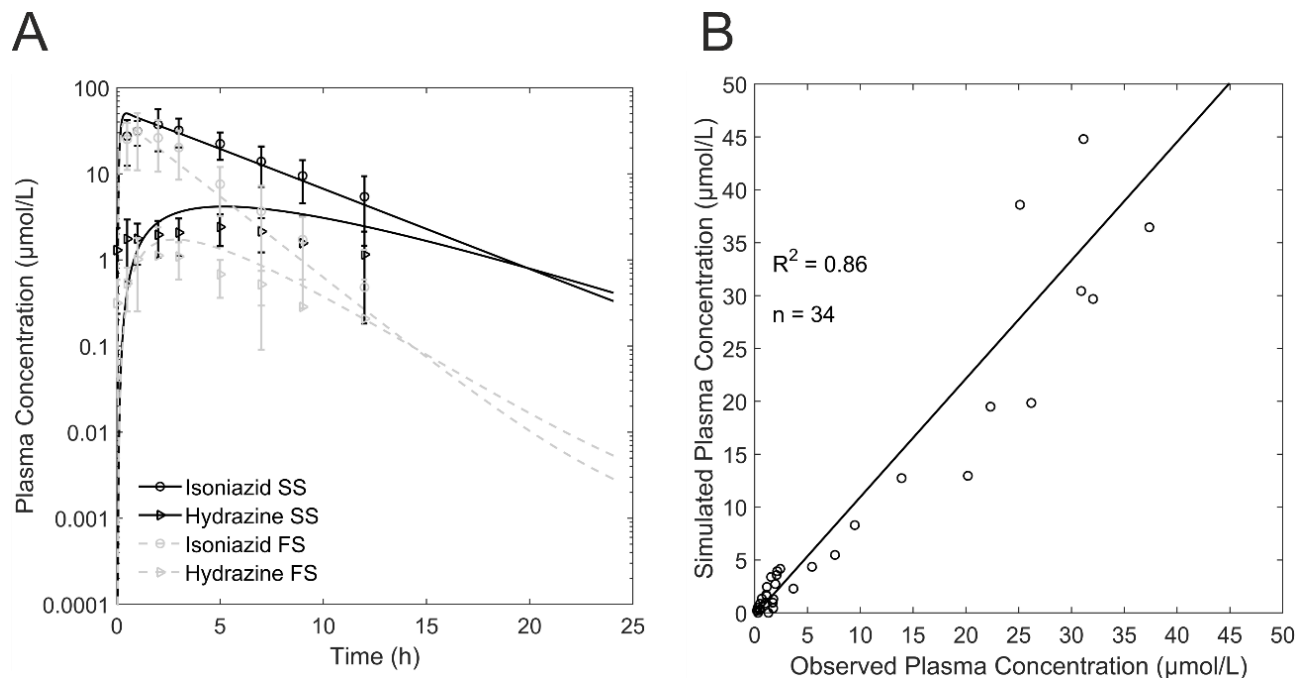

143

144 **Fig. SI 6:** Plasma concentration profiles of INH and its metabolites as simulations (lines) and experimental  
 145 data (symbols) (18). A) PK profiles of slow acetylators (SS) for INH (black solid, circles) and hydrazine (Hz)  
 146 (black solid, right-pointing triangles) and intermediate acetylators (FS) for INH (grey dashed, circles) and  
 147 Hz (grey dashed, right-pointing triangles). B) Observed (18) vs. predicted INH and Hz plasma  
 148 concentrations for slow and intermediate acetylators following single oral INH dose of 300 mg.

149

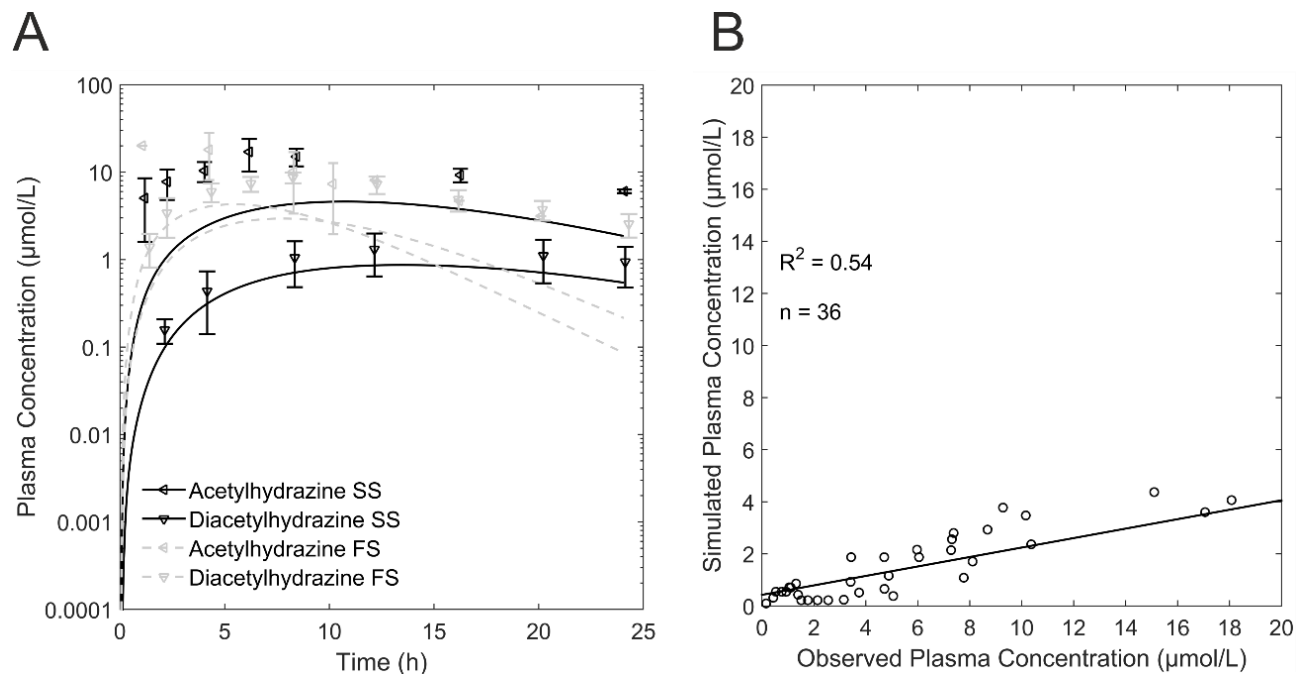

150

151 **Fig. SI 7:** Plasma concentration profiles of INH and its metabolites as simulations (lines) and experimental  
 152 data (symbols) (19). A) PK profiles of slow acetylators (SS) for AcHz (black solid, left-pointing triangles),  
 153 diacetylhrazine (DiAcHz) (black solid, down-pointing triangles) and intermediate acetylators (FS) for  
 154 AcHz (grey dashed, left-pointing triangles), DiAcHz (grey dashed, down-pointing triangles). B) Observed  
 155 (19) vs. predicted AcHz and DiAcHz plasma concentrations for slow and intermediate acetylators following  
 156 single oral INH dose of 300 mg.

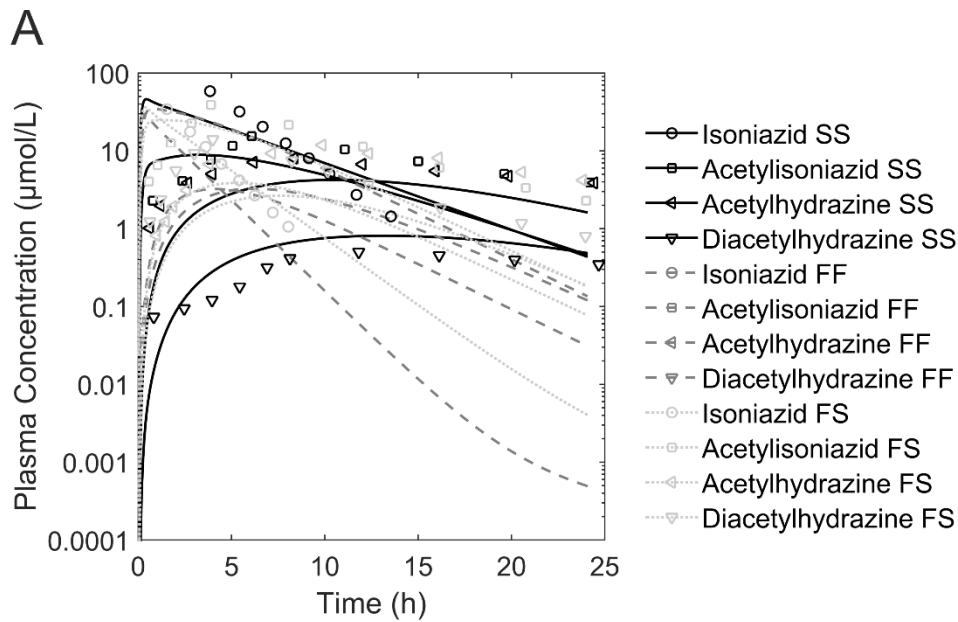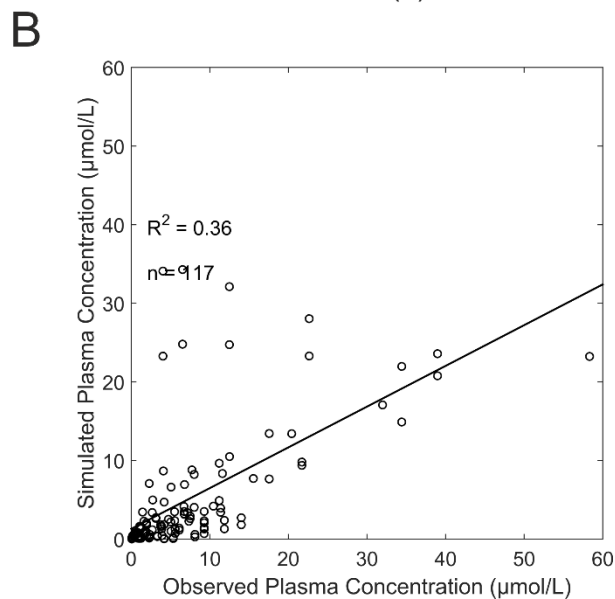

157

158 **Fig. SI 8:** Plasma concentration profiles of INH and its metabolites as simulations (lines) and experimental  
 159 data (symbols) (20). A) PK profiles of slow acetylators (SS) for INH (black solid, circles), AcINH (black solid,  
 160 squares), AcHz (black solid, left-pointing triangles), DiAcHz (black solid, down-pointing triangles) and fast  
 161 acetylators (FF) for INH (grey dashed, circles), AcINH (grey dashed, squares), AcHz (grey dashed, left-  
 162 pointing triangles), DiAcHz (grey dashed, down-pointing triangles) and intermediate acetylators (FS) for  
 163 INH (grey dotted, circles), AcINH (grey dotted, squares), AcHz (grey dotted, left-pointing triangles), DiAcHz  
 164 (grey dotted, down-pointing triangles). B) Observed (20) vs. predicted INH, AcINH, AcHz, and DiAcHz  
 165 plasma concentrations for slow, intermediate, and fast acetylators following single oral INH dose of 300 mg.

166

167 **SI References**

- 168 1. **Meyer M, Schneckener S, Ludewig B, Kuepfer L, Lippert J.** 2012. Using  
169 expression data for quantification of active processes in physiologically based  
170 pharmacokinetic modeling. *Drug Metab Dispos* **40**:892–901.
- 171 2. **Mitchell JR, Thorgeirsson UP, Black M, Timbrell JA, Snodgrass WR, Potter**  
172 **WZ, Jollow HR, Keiser HR.** 1975. Increased incidence of isoniazid hepatitis in  
173 rapid acetylators: possible relation to hydranize metabolites. *Clin Pharmacol Ther*  
174 **18**:70–79.
- 175 3. **Ellard G a, Gammon PT.** 1976. Pharmacokinetics of isoniazid metabolism in man.  
176 *J Pharmacokinet Biopharm* **4**:83–113.
- 177 4. **Mitchell JR, Thorgeirsson UP, Black M, Timbrell JA, Snodgrass WR, Potter**  
178 **WZ, Jollow HR, Keiser HR.** 1975. Increased incidence of isoniazid hepatitis in  
179 rapid acetylators: possible relation to hydranize metabolites. *Clin Pharmacol Ther*  
180 **18**:70–9.
- 181 5. **Donald PR, Sirgel FA, Botha FJ, Seifart HI, Parkin DP, Vandenplas ML, Van de**  
182 **Wal BW, Maritz JS, Mitchison DA.** 1997. The early bactericidal activity of isoniazid  
183 related to its dose size in pulmonary tuberculosis. *Am J Respir Crit Care Med*  
184 **156**:895–900.
- 185 6. **Donald PR, Sirgel F a, Venter A, Parkin DP, Seifart HI, van de Wal BW, Werely**  
186 **C, van Helden PD, Maritz JS.** 2004. The Influence of Human N-Acetyltransferase  
187 Genotype on the Early Bactericidal Activity of Isoniazid. *Clin Infect Dis* **39**:1425–  
188 1430.



- 189 7. **Jindani A, Aber VR, Edwards EA, Mitchison DA.** 1980. The early bactericidal  
190 activity of drugs in patients with pulmonary tuberculosis. *Am Rev Respir Dis*  
191 **121**:939–49.
- 192 8. **Sirgel FA, Botha FJ, Parkin DP, Van De Wal BW, Donald PR, Clark PK,**  
193 **Mitchison DA.** 1993. The early bactericidal activity of rifabutin in patients with  
194 pulmonary tuberculosis measured by sputum viable counts: a new method of drug  
195 assessment. *J Antimicrob Chemother* **32**:867–75.
- 196 9. **Donald PR, Sirgel FA, Venter A, Parkin DP, Van de Wal BW, Barendse A, Smit**  
197 **E, Carman D, Talent J, Maritz J.** 2001. Early bactericidal activity of amoxicillin in  
198 combination with clavulanic acid in patients with sputum smear-positive pulmonary  
199 tuberculosis. *Scand J Infect Dis* **33**:466–9.
- 200 10. **Donald PR, Sirgel FA, Venter A, Smit E, Parkin DP, Van de Wal BW, Doré CJ,**  
201 **Mitchison DA.** 2002. The early bactericidal activity of streptomycin. *Int J Tuberc*  
202 *Lung Dis* **6**:693–8.
- 203 11. **Sirgel FA, Donald PR, Odhiambo J, Githui W, Umapathy KC, Paramasivan CN,**  
204 **Tam CM, Kam KM, Lam CW, Sole KM, Mitchison DA.** 2000. A multicentre study  
205 of the early bactericidal activity of anti-tuberculosis drugs. *J Antimicrob Chemother*  
206 **45**:859–70.
- 207 12. **McKinney JD, Höner zu Bentrup K, Muñoz-Elías EJ, Miczak A, Chen B, Chan**  
208 **WT, Swenson D, Sacchetti JC, Jacobs WR, Russell DG.** 2000. Persistence of  
209 *Mycobacterium tuberculosis* in macrophages and mice requires the glyoxylate  
210 shunt enzyme isocitrate lyase. *Nature* **406**:735–8.

- 211 13. **Dubnau E, Chan J, Mohan VP, Smith I.** 2005. Responses of Mycobacterium  
212 tuberculosis to Growth in the Mouse Lung. *Infect Immun* **73**:3754–3757.
- 213 14. **Boxenbaum HG, Riegelman S, Elashoff RM.** 1974. Statistical estimations in  
214 pharmacokinetics. *J Pharmacokinet Biopharm* **2**:123–48.
- 215 15. **Ellard G a, Gammon PT, Wallace SM.** 1972. The determination of isoniazid and  
216 its metabolites acetylisoniazid, monoacetylhydrazine, diacetylhydrazine,  
217 isonicotinic acid and isonicotinylglycine in serum and urine. *Biochem J* **126**:449–  
218 458.
- 219 16. **Kubota R, Ohno M, Hasunuma T, Iijima H, Azuma J.** 2007. Dose-escalation  
220 study of isoniazid in healthy volunteers with the rapid acetylator genotype of  
221 arylamine N-acetyltransferase 2. *Eur J Clin Pharmacol* **63**:927–933.
- 222 17. **Peretti E, Karlaganis G, Lauterburg BH.** 1987. Acetylation of acetylhydrazine, the  
223 toxic metabolite of isoniazid, in humans. Inhibition by concomitant administration of  
224 isoniazid. *J Pharmacol Exp Ther* **243**:686–9.
- 225 18. **Pea F, Milaneschi R, Baraldo M, Talmassons G, Furlanut M.** 1999. Isoniazid and  
226 its Hydrazine Metabolite in Patients with Tuberculosis. *Clin Drug Investig* **17**:145–  
227 154.
- 228 19. **Lauterburg BH, Smith C V, Todd EL, Mitchell JR.** 1985. Pharmacokinetics of the  
229 toxic hydrazino metabolites formed from isoniazid in humans. *J Pharmacol Exp*  
230 *Ther* **235**:566–570.
- 231 20. **Lauterburg BH, Smith C V., Mitchell JR.** 1981. Determination of isoniazid and its  
232 hydrazino metabolites, acetylisoniazid, acetylhydrazine, and diacetylhydrazine in

233 human plasma by gas chromatography—mass spectrometry. J Chromatogr B  
234 Biomed Sci Appl.  
235
